# Supplementary material for: Accelerating retreat and high-elevation thinning of glaciers in central Spitsbergen
Source: Copernicus journal article supplement (doi:10.5194/tc-10-1317-2016), 2016-06-24
Supplement: Supplementary file 1 [file Supplementary_table.xls]

## Sheet: DL database
			Data availability				Area, A (km2)				Length, L (m)				Length change rates, dL/dt (m a-1)				Elevation and volume changes 1990-2009/11					2009/11 geometry parameters
Glacier name	ID after König et al. (2013) and Nuth et al. (2013)	Comment	Max*	1960s	1990	2009/11	Max*	1960s	1990	2009/11	Max (± 50 m)	1960s (± 25 m)	1990 (± 10 m)	2009/11 (± 5 m)	Max-1960 (± 0.9 m a-1)	1960s-1990 (± 1.1 m a-1)	1990-2009/11 (± 0.6 m a-1)	Max-2009/11 (± 0.5 m a-1)	Elevation change, dH (m)	Elevation change rate, dH/dt (m a-1)	Volume change, dV (millions m3)	Volume change rate, dV/dt (millions m3 a-1)	Mass balance (m w.e. a-1)	Min. elevation, H min (m)	Max. elevation, H max (m)	Median elevation, H med (m)	Lowest historical elevation, H mor (m)	Theoretical steady-state ELA, tELA (m)	Mean slope, S (deg.)	Mean aspect, α (deg.)	LONG E	LAT N	Subregion
Abeltoppen, glacier*	16813	Glacier NW from Abeltoppen	1900	1966	1990	2011	2.94 ± 0.46	2.38 ± 0.24	1.83 ± 0.10	1.17 ± 0.04	3784	3487	2898	2053	-4.5	-24.5	-40.2	-15.6	-16.5 ± 3.4	-0.78 ± 0.16	-24.77 ± 5.11	-1.18 ± 0.24	-0.71 ± 0.15	330	1045	513	151	499	16.4	5	15.862	78.862	DL-N
Abeltoppen, ice patch*	16813	A small ice patch disconnected from SW part of 16813	1900	1966	1990	2011	0	0	0	0.04 ± 0.01									n/d***	n/d***	n/d***	n/d***	n/d***	637	779	685	n/d*	672	36.5	84	15.817	78.860	DL-N
Arbobreen	16803	Possibly surge-type glacier	1900	1966	1990	2011	2.81 ± 0.59	1.99 ± 0.23	1.70 ± 0.08	1.53 ± 0.04	5039	3801	3451	3147	-18.7	-14.6	-14.5	-17	-5.7 ± 3.8	-0.27 ± 0.18	-9.14 ± 6.12	-0.44 ± 0.29	-0.24 ± 0.16	316	850	604	154	580	11.7	45	15.628	78.974	DL-N
Balliolbreen	16818.1, part of		1900	1966	1990	2011	8.65 ± 1.35	7.87 ± 0.65	7.11 ± 0.25	6.16 ± 0.15	8102	7576	7083	6473	-8.0	-20.5	-29.1	-14.7	-18.3 ± 1.9	-0.87 ± 0.09	-121.75 ± 12.47	-5.80 ± 0.59	-0.79 ± 0.08	101	871	449	74	412	10.5	46	16.262	78.801	DL-C
Balliolbreen basin, glacier*	16818.2	One of two former western tributaries of Balliolbreen, northern one	1900	1966	1990	2009	0.73 ± 0.24	0.65 ± 0.11	0.57 ± 0.04	0.49 ± 0.02									-8.1 ± 5.1	-0.43 ± 0.27	-4.32 ± 2.68	-0.23 ± 0.14	-0.39 ± 0.24	307	636	491	202	478	14.1	44	16.255	78.825	DL-C
Balliolbreen basin, glacier*	16818.3	One of two former western tributaries of Balliolbreen, southern one	1900	1966	1990	2011	0.40 ± 0.19	0.36 ± 0.09	0.27 ± 0.03	0.24 ± 0.01									-9.7 ± 7.0	-0.46 ± 0.33	-2.44 ± 1.76	-0.12 ± 0.08	-0.42 ± 0.30	339	703	557	250	540	19.2	42	16.276	78.822	DL-C
Bertilbreen	14515.1	1960-1990 dH/dt = -0.53 ± 0.17 m a-1 (Małecki, 2013)	1900	1966	1990	2009	5.53 ± 0.72	4.99 ± 0.35	4.36 ± 0.13	3.81 ± 0.06	5896	5663	5376	4662	-3.5	-11.9	-37.6	-11.3	-15.0 ± 1.8	-0.79 ± 0.10	-61.44 ± 7.40	-3.23 ± 0.39	-0.71 ± 0.09	178	736	483	93	447	9.1	140	16.259	78.699	DL-C
Bertilbreen basin, glacier*	14515.2	Former western tributary of Bertilbreen	1900	1966	1990	2009	0.43 ± 0.16	0.29 ± 0.06	0.24 ± 0.02	0.13 ± 0.01									-13.3 ± 7.8	-0.70 ± 0.41	-2.44 ± 1.41	-0.13 ± 0.07	-0.63 ± 0.37	365	574	466	282	454	17.5	74	16.230	78.679	DL-C
Bertrambreen	14509	Ice divides adopted from König et al. (2013) & Nuth et al. (2013)	1900	1966	1990	2011	3.39 ± 0.52	3.10 ± 0.24	2.99 ± 0.10	2.92 ± 0.05	4680	4401	4401	4299	-4.2	0	-4.8	-3.4	n/d*	n/d*	n/d*	n/d*	n/d*	379	784	635	345	612	8.1	171	16.814	78.749	DL-C
Birger-Johnsonfjellet, ice patch*		Ice patch on Birger-Johnsonfjellet	1900	1966	1990	2009	0.42 ± 0.16	0.42 ± 0.08	0.32 ± 0.04	0.16 ± 0.01									-6.3 ± 12.5	-0.33 ± 0.66	-1.54 ± 3.06	-0.08 ± 0.16	-0.30 ± 0.59	568	697	615	504	605	19.3	125	16.347	78.739	DL-C
Bollen, ice patch*		Ice patch on Bollen	1900	1966	1990	2011	0.66 ± 0.19	0.66 ± 0.09	0.42 ± 0.03	0.27 ± 0.02									-7.1 ± 9.7	-0.34 ± 0.46	-2.48 ± 3.36	-0.12 ± 0.16	-0.31 ± 0.42	532	710	601	494	586	23.3	5	15.597	78.703	DL-S
Caiusbreen	14607, part of		1900	1960	1990	2009	3.77 ± 0.58	3.57 ± 0.29	3.35 ± 0.11	3.01 ± 0.06	4369	4306	4254	4174	-1.1	-1.8	-4.2	-1.8	-16.5 ± 2.5	-0.87 ± 0.13	-52.41 ± 8.03	-2.76 ± 0.42	-0.78 ± 0.12	358	866	573	337	538	8.2	280	16.055	78.765	DL-C
Cambridgebreen	16818.1, part of		1900	1966	1990	2011	12.97 ± 1.48	12.27 ± 0.75	11.37 ± 0.29	10.11 ± 0.17	7978	7564	7239	6758	-6.3	-13.5	-22.9	-11.0	-18.5 ± 1.2	-0.88 ± 0.06	-198.49 ± 12.17	-9.45 ± 0.58	-0.79 ± 0.05	100	828	440	77	405	8.1	351	16.409	78.793	DL-C
Citadellet, ice patch*		Ice patch on Citadellet	1900	1966	1990	2011	1.29 ± 0.35	1.29 ± 0.17	0.92 ± 0.06	0.56 ± 0.02									-7.2 ± 7.0	-0.34 ± 0.33	-5.35 ± 5.17	-0.25 ± 0.25	-0.31 ± 0.30	626	1065	995	390	975	17.8	296	15.785	78.807	DL-C
Delbreen	16812		1900	1966	1990	2011	5.04 ± 0.87	3.72 ± 0.41	2.68 ± 0.17	0	5054	4423	3550	1730	-9.6	-36.4	-86.7	-30.0	-20.6 ± 3.7	-0.98 ± 0.18	-27.58 ± 4.71	-1.31 ± 0.22	-0.88 ± 0.16	n/d**	n/d**	n/d**	120	n/d**	n/d**	n/d**	15.785	78.878	DL-N
Delbreen, central glacier	16812.1, part of		1900	1966	1990	2011	0	0	0	0.80 ± 0.03									n/d***	n/d***	n/d***	n/d***	n/d***	412	879	599	n/d*	575	17.3	356	15.768	78.865	DL-N
Delbreen, eastern glacier	16812.1, part of		1900	1966	1990	2011	0	0	0	0.50 ± 0.02									n/d***	n/d***	n/d***	n/d***	n/d***	427	909	640	n/d*	599	17.8	356	15.802	78.867	DL-N
Delbreen, western glacier	16812.2, part of		1900	1966	1990	2011	0	0	0	0.64 ± 0.02									n/d***	n/d***	n/d***	n/d***	n/d***	340	728	513	n/d*	489	17	42	15.734	78.876	DL-N
Delbreen basin, ice patch*	16812.2, part of	Ice patch uphill from western Delbreen	1900	1966	1990	2011	0.39 ± 0.17	0.39 ± 0.08	0.34 ± 0.03	0.24 ± 0.01									-12.3 ± 10.9	-0.59 ± 0.52	-3.54 ± 3.12	-0.17 ± 0.15	-0.53 ± 0.47	605	969	760	552	745	24.2	58	15.730	78.869	DL-N
Ebbabreen	14508	Ice divides adopted from König et al. (2013) & Nuth et al. (2013)	1900	1961	1990	2011	29.00 ± 2.15	28.16 ± 1.13	25.25 ± 0.47	24.35 ± 0.29	8032*	7690*	7283*	7007*	-5.6*	-14.1*	-13.1*	-9.2*	n/d*	n/d*	n/d*	n/d*	n/d*	104	1052	612	24	577	7.7	242	16.946	78.738	DL-C
Ebbabreen, length of the NW part		Length measured from the central part of the ice divide	1900	1961	1990	2011					7542	7319	6774	6551	-3.7	-18.8	-10.6	-8.9															DL-C
Ebbabreen, length of the SE part		Length measured from the Flemingfjellet cirque	1900	1961	1990	2011					8521	8061	7791	7463	-7.5	-9.3	-15.6	-9.5															DL-C
Ebbabreen basin, ice apron*		Ice apron between Ebbabreen and Pollockbreen	1900	1961	1990	2011	0.21 ± 0.10	0.21 ± 0.05	0.17 ± 0.02	0.12 ± 0.02									n/d*	n/d*	n/d*	n/d*	n/d*	593	885	767	598	750	35.7	343	16.898	78.711	DL-C
Elsabreen	14514	1960-1990 dH/dt = -0.44 ± 0.50 m a-1 (Małecki, 2013)	1900	1966	1990	2009	0.81 ± 0.23	0.72 ± 0.10	0.50 ± 0.04	0.15 ± 0.01	1802	1613	1477	623	-2.9	-5.7	-44.9	-10.8	-18.1 ± 9.4	-0.95 ± 0.50	-5.90 ± 3.05	-0.31 ± 0.16	-0.86 ± 0.45	442	673	552	191	540	22.1	6	16.368	78.683	DL-C
Elsabreen basin, glacier*		Small glacier S-SE from Mumien summit	1900	1966	1990	2011	0.15 ± 0.09	0.15 ± 0.04	0	0									n/d**	n/d**	n/d**	n/d**	n/d**	n/d**	n/d**	n/d**	393	n/d**	n/d**	n/d**	16.327	78.692	DL-C
Fensalberget, glacier*		Glacier NW from Fensalberget summit	1900	1966	1990	2011	1.84 ± 0.41	1.62 ± 0.19	1.39 ± 0.08	0.90 ± 0.03									-12.4 ± 5.2	-0.59 ± 0.25	-14.22 ± 5.90	-0.68 ± 0.28	-0.53 ± 0.22	434	804	622	264	607	16.4	321	15.722	78.702	DL-S
Fensalberget, ice patch*		Ice patch NE from Fensalberget summit	1900	1966	1990	2011	0.51 ± 0.16	0.51 ± 0.08	0.37 ± 0.03	0.30 ± 0.01									-10.4 ± 9.7	-0.50 ± 0.46	-3.48 ± 3.23	-0.17 ± 0.15	-0.45 ± 0.41	510	803	651	373	634	20.6	45	15.766	78.699	DL-S
Fensalberget, ice patch*		Ice patch on SW slopes of Fensalberget	1900	1966	1990	2011	0.58 ± 0.18	0.58 ± 0.09	0.19 ± 0.02	0.04 ± 0.01									-19.2 ± 15.7	-0.91 ± 0.75	-2.12 ± 1.73	-0.10 ± 0.08	-0.82 ± 0.67	513	608	539	482	532	17.4	265	15.749	78.690	DL-S
Ferdinandbreen	14513.1	1960-1990 dH/dt = -0.35 ± 0.32 m a-1 (Małecki, 2013)	1900	1966	1990	2009	2.20 ± 0.47	1.59 ± 0.20	1.17 ± 0.07	0.88 ± 0.04	3643	3055	2246	2111	-8.9	-33.7	-7.1	-14.1	-15.9 ± 3.4	-0.84 ± 0.18	-16.29 ± 3.45	-0.86 ± 0.18	-0.75 ± 0.16	241	664	420	65	384	14.8	71	16.323	78.703	DL-C
Ferdinandbreen basin, ice patch*	14513.2, part of	Ice patch N from Mumien peak, former tributary of Ferdinandbreen	1900	1966	1990	2009	0.21 ± 0.10	0.21 ± 0.05	0.16 ± 0.02	0.12 ± 0.01									-5.9 ± 14.9	-0.31 ± 0.78	-0.83 ± 2.09	-0.04 ± 0.11	-0.28 ± 0.71	539	743	641	454	625	25.7	1	16.306	78.710	DL-C
Ferdinandbreen basin, ice patch*	14513.2, part of	Ice patch NE from Mumien peak, former tributary of Ferdinandbreen	1900	1966	1990	2009	0.29 ± 0.15	0.27 ± 0.06	0.17 ± 0.02	0.09 ± 0.01									-10.2 ± 12.6	-0.54 ± 0.66	-1.31 ± 1.61	-0.07 ± 0.08	-0.48 ± 0.60	414	714	530	327	508	26.9	29	16.341	78.703	DL-C
Friggkåpa	14602+14604		1900	1966	1990	2011	6.84 ± 0.88	6.82 ± 0.44	6.18 ± 0.16	5.42 ± 0.09	2963***	2963*	2882*	2734*	0*	-3.4*	-7.1*	-2.1*	-13.1 ± 2.0	-0.62 ± 0.10	-75.72 ± 11.55	-3.61 ± 0.55	-0.56 ± 0.09	288	821	584	259	568	8.4	264	15.863	78.685	DL-S
Friggkåpa, length of the N part		Length measured from the mountain ridge	1900	1966	1990	2011					n/d**	4421	4327	4227	0**	-3.9	-4.8	-1.7															DL-S
Friggkåpa, length of the W outlet		Length measured from the ice divide	1900	1966	1990	2011					n/d**	2911	2830	2547	0**	-3.4	-13.5	-3.3															DL-S
Friggkåpa, length of the S outlet		Length measured from the ice divide	1900	1966	1990	2011					n/d**	1557	1490	1427	0**	-2.8	-3.0	-1.2															DL-S
Friggkåpa area, glacier*	14602.2	Glacier to the south of the western outlet of Friggkåpa	1900	1966	1990	2011	1.34 ± 0.32	1.33 ± 0.15	0.97 ± 0.06	0.70 ± 0.03	2438	2369	2118	1833	-1.0	-10.5	-13.6	-5.4	-19.2 ± 4.1	-0.91 ± 0.20	-16.01 ± 3.40	-0.76 ± 0.16	-0.82 ± 0.18	307	591	490	234	475	9.4	302	15.798	78.673	DL-S
Friggkåpa area, glacier*	14602.3	Glacier to the west of the southern outlet of Friggkåpa	1900	1966	1990	2011	0.62 ± 0.19	0.62 ± 0.09	0.45 ± 0.03	0.38 ± 0.02	n/d**	915	778	680	0**	-5.7	-4.7	-2.1	-13.8 ± 7.3	-0.66 ± 0.35	-5.79 ± 3.05	-0.28 ± 0.15	-0.59 ± 0.31	465	681	549	419	542	11.1	92	15.837	78.669	DL-S
Friggkåpa area, glacier*	14519.1	Glacier to the east of the southern outlet of Friggkåpa	1900	1966	1990	2011	0.55 ± 0.16	0.55 ± 0.08	0.47 ± 0.03	0.37 ± 0.01	n/d**	884	783	692	0**	-4.2	-4.3	-1.7	-13.4 ± 8.5	-0.64 ± 0.41	-5.66 ± 3.60	-0.27 ± 0.17	-0.57 ± 0.37	526	714	611	504	600	10.8	201	15.934	78.676	DL-S
Friggkåpa area, glacier*	14519.2	Glacier at the head of Odindalen	1900	1966	1990	2009	0.91 ± 0.26	0.84 ± 0.12	0.72 ± 0.05	0.55 ± 0.02	1978	1819	1695	1524	-2.4	-5.1	-9	-4.2	-11.3 ± 6.3	-0.59 ± 0.33	-7.17 ± 3.96	-0.38 ± 0.21	-0.54 ± 0.30	382	780	615	315	589	13.6	119	15.958	78.679	DL-S
Frostisen	14522		1930	1960	1990	2011	13.74 ± 1.32	12.58 ± 0.63	10.62 ± 0.27	8.46 ± 0.14	3359***	3157*	2766*	2202*	-5.4*	-13.0*	-26.9*	-13.3*	-14.9 ± 1.3	-0.71 ± 0.06	-142.42 ± 12.09	-6.78 ± 0.58	-0.64 ± 0.06	266	695	517	58	500	7.1	14	15.707	78.544	DL-S
Frostisen, length of the NE outlet		Also known as Studentbreen, surge ca. 1930, length measured from the ice summit	1930	1960	1990	2011					5819	5451	4617	3213	-12.3	-27.8	-66.9	-32.2															DL-S
Frostisen, length of the NW outlet		Length measured from the Frostisryggen ridge	1900	1960	1990	2011					3091	2852	2653	2492	-4.0	-6.6	-7.7	-5.4															DL-S
Frostisen, length of the SW lobe		Length measured from the ice summit	1900	1960	1990	2011					n/d**	1167	1027	900	0**	-4.7	-6.0	-2.4															DL-S
Frostisryggen, ice patch*		Ice patch disconnected from western Frostisen	1900	1960	1990	2011	0	0	0	0.11 ± 0.01									n/d***	n/d***	n/d***	n/d***	n/d***	457	607	511	n/d*	503	17.6	286	15.628	78.530	DL-S
Frostistinden, ice patch*	14522.6	Small glacier NE from Frostistinden	1900	1960	1990	2011	0.53 ± 0.23	0.53 ± 0.12	0.21 ± 0.02	0.15 ± 0.01									n/d***	n/d***	n/d***	n/d***	n/d***	504	698	591	n/d*	581	16.2	77	15.812	78.542	DL-S
Fulla, glacier*	14632.2	Glacier N from Fulla peak	1900	1966	1990	2009	0.33 ± 0.13	0.33 ± 0.06	0.19 ± 0.02	0.14 ± 0.01									-12.9 ± 13.2	-0.68 ± 0.69	-2.10 ± 2.14	-0.11 ± 0.11	-0.61 ± 0.62	520	790	620	510	590	25.1	343	16.015	78.712	DL-S
Fyrisbreen	14617.1+14617.2	Surge ca. 1960	1900	1966	1990	2011	12.32 ± 1.94	8.41 ± 0.83	0	0									n/d**	n/d**	n/d**	n/d**	n/d**	n/d**	n/d**	n/d**	n/d**	n/d**	n/d**	n/d**	15.602	78.935	DL-N
Fyrisbreen, central glacier	14617.1, part of	Surge ca. 1960	1900	1966	1990	2011	0	0	1.51 ± 0.08	1.24 ± 0.04									-12.1 ± 4.6	-0.58 ± 0.22	-16.64 ± 6.27	-0.79 ± 0.30	-0.52 ± 0.20	435	1051	731	435	712	13.6	287	15.602	78.935	DL-N
Fyrisbreen, northern glacier	14617.2	Surge ca. 1960	1900	1966	1990	2011	0	0	2.42 ± 0.09	2.09 ± 0.04									-10.2 ± 3.7	-0.49 ± 0.18	-22.95 ± 8.28	-1.09 ± 0.39	-0.44 ± 0.16	506	957	715	368	698	10.5	192	15.558	78.952	DL-N
Fyrisbreen, sourthern glacier	14617.1, part of	Surge ca. 1960	1900	1966	1990	2011	0	0	3.56 ± 0.15	2.97 ± 0.08	7815	5820	4907	4581	-30.2	-38.0	-15.5	-29.1	-15.5 ± 2.5	-0.74 ± 0.12	-50.63 ± 8.17	-2.41 ± 0.39	-0.67 ± 0.11	238	1064	565	21	515	13	317	15.560	78.925	DL-N
Gavlhaugbreen	14614		1900	1966	1990	2011	3.84 ± 0.64	2.92 ± 0.30	2.43 ± 0.12	1.55 ± 0.07	4861	4417	4009	3311	-6.7	-17.0	-33.2	-14.0	-16.9 ± 3.4	-0.80 ± 0.16	-33.68 ± 6.61	-1.60 ± 0.31	-0.72 ± 0.14	309	992	560	141	516	18	330	15.521	78.875	DL-N
Gavlhaugen, ice patch*	14613	Ice patch on Gavlhaugen peak	1900	1966	1990	2011	1.77 ± 0.35	1.77 ± 0.18	1.15 ± 0.05	0.99 ± 0.03									-1.7 ± 5.4	-0.08 ± 0.26	-1.79 ± 5.75	-0.09 ± 0.27	-0.07 ± 0.23	781	988	898	643	885	12.2	220	15.575	78.866	DL-N
Gavlkampen, ice patch*		Ice patch on Gavlkampen	1900	1966	1990	2011	0.34 ± 0.17	0.34 ± 0.08	0.22 ± 0.03	0.18 ± 0.02									-7.8 ± 12.6	-0.37 ± 0.60	-1.58 ± 2.55	-0.08 ± 0.12	-0.34 ± 0.54	692	920	865	695	858	23.6	310	15.563	78.883	DL-N
Gnå, glacier*	14632.1	Glacier N from Gnå	1900	1966	1990	2009	1.68 ± 0.35	1.35 ± 0.20	0.80 ± 0.05	0.53 ± 0.02	1843	1563	1274	1129	-4.2	-12.0	-7.6	-6.5	-14.3 ± 4.4	-0.75 ± 0.23	-9.52 ± 2.90	-0.50 ± 0.15	-0.68 ± 0.21	368	613	463	276	449	12.9	7	15.971	78.708	DL-C
Gnå, ice apron*		Ice aprons hanging from Gna and Fulla	1900	1966	1990	2011	0	0	0.20 ± 0.03	0.18 ± 0.02									-8.8 ± 12.7	-0.42 ± 0.61	-1.65 ± 2.39	-0.08 ± 0.11	-0.38 ± 0.54	611	951	755	597	740	33.4	355	15.975	78.702	DL-C
Gnå, glacier*	14631	Glacier W from Gnå	1900	1966	1990	2011	1.82 ± 0.45	1.43 ± 0.18	1.02 ± 0.06	0.78 ± 0.03	2919	2416	2321	2132	-7.6	-3.9	-9.0	-7.1	-15.9 ± 4.4	-0.76 ± 0.21	-14.26 ± 3.87	-0.68 ± 0.18	-0.68 ± 0.19	352	836	483	236	452	15.4	353	15.911	78.697	DL-C
Gnå, ice apron*		Ice aprons between Frigkapa and 14631	1900	1966	1990	2011	0	0	0.12 ± 0.02	0.07 ± 0.01									-10.8 ± 19.7	-0.51 ± 0.94	-1.02 ± 1.86	-0.05 ± 0.09	-0.46 ± 0.84	541	834	672	505	659	32.2	335	15.902	78.694	DL-C
Gnå, ice patch*		Ice patch between Frigkapa and 14631	1900	1966	1990	2011	0.24 ± 0.11	0.24 ± 0.05	0.13 ± 0.02	0.07 ± 0.01									0.9 ± -19.0	0.04 ± -0.91	0.09 ± -1.97	0.00 ± -0.09	0.04 ± -0.82	621	772	646	576	639	19.1	258	15.882	78.695	DL-C
Gonvillebreen	14607, part of		1900	1960	1990	2009	3.13 ± 0.49	3.11 ± 0.24	2.92 ± 0.10	2.62 ± 0.06	3613	3594	3488	3333	-0.3	-3.5	-8.1	-2.6	-13.2 ± 2.9	-0.69 ± 0.15	-36.56 ± 8.10	-1.92 ± 0.43	-0.62 ± 0.14	418	895	632	392	600	10.5	223	16.035	78.778	DL-C
Grappigen, glacier*	16899.01	Glacier far N from Grappigen peak	1900	1966	1990	2011	0.94 ± 0.24	0.86 ± 0.11	0.56 ± 0.04	0.39 ± 0.02	1735	1580	1498	1129	-2.3	-3.4	-17.6	-5.5	-16.6 ± 7.8	-0.79 ± 0.37	-7.88 ± 3.67	-0.38 ± 0.17	-0.71 ± 0.33	487	765	605	404	580	18.6	359	16.010	78.873	DL-N
Grappigen, glacier*	16814.2	Glacier NW from Grappigen peak	1900	1966	1990	2011	1.04 ± 0.33	0.96 ± 0.15	0.69 ± 0.05	0.56 ± 0.03									-8.3 ± 6.8	-0.40 ± 0.32	-5.24 ± 4.26	-0.25 ± 0.20	-0.36 ± 0.29	403	1018	760	266	700	24.5	327	15.984	78.862	DL-N
Grappigen, glacier*	16814.1	Glacier W from Grappigen peak	1900	1966	1990	2011	1.29 ± 0.34	1.19 ± 0.14	0.92 ± 0.05	0.76 ± 0.03	2840	2324	2167	1907	-7.8	-6.5	-12.4	-8.4	-14.0 ± 5.4	-0.67 ± 0.26	-11.82 ± 4.49	-0.56 ± 0.21	-0.60 ± 0.23	390	892	637	268	597	17.1	21	15.927	78.857	DL-N
Grønhorg, glacier*	14616	Glacier at the foot of Grønhorg	1900	1966	1990	2011	1.78 ± 0.37	1.48 ± 0.16	1.35 ± 0.06	1.04 ± 0.04	3149	2592	2540	2463	-8.4	-2.2	-3.6	-6.2	-16.5 ± 4.8	-0.79 ± 0.23	-19.70 ± 5.66	-0.94 ± 0.27	-0.71 ± 0.20	416	914	601	264	573	12.5	291	15.499	78.913	DL-N
Grønhorg/Vasskilryggen, glacier*	14615	Glacier between Grønhorg and Vasskilryggen	1900	1966	1990	2011	2.24 ± 0.40	2.09 ± 0.20	1.83 ± 0.09	0.99 ± 0.03	3325	3221	3195	2957	-1.6	-1.1	-11.3	-3.3	-13.8 ± 4.5	-0.66 ± 0.22	-19.46 ± 6.36	-0.93 ± 0.30	-0.59 ± 0.19	399	775	610	352	592	10.6	156	15.569	78.902	DL-N
Grønhorg/Vasskilryggen, glacier*	14615, part of	Glacier between Grønhorg and Vasskilryggen, disconnected N part	1900	1966	1990	2011	0	0	0	0.37 ± 0.01									n/d***	n/d***	n/d***	n/d***	n/d***	740	915	830	n/d*	819	14.3	190	15.576	78.911	DL-N
Gyldenbreen	16815		1900	1966	1990	2011	5.15 ± 0.73	4.83 ± 0.36	3.15 ± 0.17	1.71 ± 0.06	4257	3995	3723	3444	-4.0	-11.3	-13.3	-7.3	-18.6 ± 3.6	-0.89 ± 0.17	-45.14 ± 8.60	-2.15 ± 0.41	-0.80 ± 0.15	316	949	649	246	602	17.9	32	16.068	78.856	DL-N
Gyldenbreen basin, glacier*	16815, part of	Disconnected western part of Gyldenbreen	1900	1966	1990	2011	0	0	0	0.19 ± 0.01									n/d***	n/d***	n/d***	n/d***	n/d***	471	730	561	n/d*	548	19.9	54	16.044	78.862	DL-N
Gyldenbreen basin, ice patch*	16815, part of	Disconnected ice patch from the former western tributary of Gyldenbreen	1900	1966	1990	2011	0	0	0	0.08 ± 0.01									n/d***	n/d***	n/d***	n/d***	n/d***	657	821	741	n/d*	731	24.6	69	16.028	78.863	DL-N
Gyldenbreen basin, ice patch*	16815, part of	Disconnected eastern part of Gyldenbreen	1900	1966	1990	2011	0	0	0	0.08 ± 0.01									n/d***	n/d***	n/d***	n/d***	n/d***	590	744	655	n/d*	645	21	322	16.116	78.857	DL-N
Gyldenbreen basin, ice patch*	16815.2	Disconnected NW part of Gyldenbreen	1900	1966	1990	2011	0	0	0.15 ± 0.02	0.08 ± 0.01									-12.3 ± 9.2	-0.59 ± 0.44	-1.42 ± 1.05	-0.07 ± 0.05	-0.53 ± 0.39	514	741	624	n/d*	601	23	87	16.039	78.868	DL-N
Gyldenfjellet, ice patch*		Ice patch NE from Gyldenfjellet peak	1900	1966	1990	2011	0.23 ± 0.11	0.21 ± 0.05	0.16 ± 0.02	0.10 ± 0.01									-11.1 ± 16.7	-0.53 ± 0.80	-1.41 ± 2.12	-0.07 ± 0.10	-0.48 ± 0.72	544	710	637	534	629	17	55	16.130	78.856	DL-N
Hoegdalsbreen	16804.1	Possible past surge behaviour, deformed medial moraines	1900	1966	1990	2011	10.14 ± 1.41	9.15 ± 0.68	8.44 ± 0.27	7.51 ± 0.15	7608	7069	6724	6217	-8.2	-14.4	-24.1	-12.5	-13.6 ± 1.7	-0.65 ± 0.08	-108.86 ± 13.33	-5.18 ± 0.63	-0.58 ± 0.07	279	1086	598	160	560	10.6	16	15.694	78.946	DL-N
Hoegdalsbreen basin, glacier*	16804.2	Disconnected NW tributary of Hoegdalsbreen	1900	1966	1990	2011	0.79 ± 0.23	0.69 ± 0.11	0.36 ± 0.03	0.29 ± 0.01									-8.5 ± 9.9	-0.40 ± 0.47	-2.75 ± 3.20	-0.13 ± 0.15	-0.36 ± 0.42	537	823	684	428	668	20.6	69	15.654	78.963	DL-N
Hoegdalsbreen basin, glacier*	16804.3	Disconnected NE tributary of Hoegdalsbreen	1900	1966	1990	2011	0.66 ± 0.22	0.66 ± 0.11	0.48 ± 0.04	0.38 ± 0.02									-8.4 ± 8.2	-0.40 ± 0.39	-3.61 ± 3.52	-0.17 ± 0.17	-0.36 ± 0.35	444	958	761	388	700	21.5	343	15.775	78.956	DL-N
Hørbyebreen	14511	Surge, likely late 19th/early 20th century, 1960-1990 dH/dt = -0.45 ± 0.08 m a-1 (Małecki et al., 2013)	1900	1960	1990	2011	24.69 ± 2.40	22.07 ± 1.22	19.13 ± 0.51	15.94 ± 0.30	10599	10204	9534	8255	-6.6	-22.3	-60.9	-21.1	-15.4 ± 1.0	-0.73 ± 0.05	-270.31 ± 17.61	-12.87 ± 0.84	-0.66 ± 0.04	67	894	490	24	450	9	69	16.213	78.76	DL-C
Horbyebreen basin, glacier*		Niche glacier SE from Cheopsfjellet peak	1900	1966	1990	2011	0.62 ± 0.24	0.45 ± 0.10	0.20 ± 0.03	0.12 ± 0.02									-12.8 ± 10.6	-0.61 ± 0.50	-2.10 ± 1.72	-0.10 ± 0.08	-0.55 ± 0.45	337	736	497	162	450	23.7	161	16.422	78.772	DL-C
Hørbyebreen basin, glacier*		Small glacier on N slopes of Birger-Johnsonfjellet, former tributary of Hørbyebreen	1900	1960	1990	2009	0.55 ± 0.21	0.55 ± 0.10	0.43 ± 0.04	0.31 ± 0.02									-14.9 ± 6.8	-0.78 ± 0.36	-5.48 ± 2.48	-0.29 ± 0.13	-0.70 ± 0.32	230	601	365	195	346	18.1	23	16.331	78.745	DL-C
Hørbyebreen basin, glacier*		Small glacier SW from Cheopsfjellet peak	1900	1960	1990	2009	0.72 ± 0.27	0.65 ± 0.14	0.40 ± 0.05	0.29 ± 0.02									-12.1 ± 5.6	-0.64 ± 0.29	-4.20 ± 1.91	-0.22 ± 0.10	-0.57 ± 0.26	348	747	498	183	474	21.2	173	16.358	78.771	DL-C
Faraofjellet, ice patch*		Ice patch on Faraofjellet	1900	1966	1990	2009	0.39 ± 0.15	0.39 ± 0.08	0.34 ± 0.03	0.26 ± 0.02									-7.1 ± 10.4	-0.37 ± 0.55	-2.14 ± 3.13	-0.11 ± 0.16	-0.34 ± 0.49	605	826	740	590	730	17.2	186	16.325	78.774	DL-C
Ibsenfjella, glacier*		Cirque glacier on NW slopes of Ibsenfjella	1900	1960	1990	2011	0.96 ± 0.21	0.67 ± 0.09	0.44 ± 0.03	0.27 ± 0.02	1314	812	617	513	-8.4	-6.5	-5.0	-7.2	-15.7 ± 5.9	-0.75 ± 0.28	-5.56 ± 2.07	-0.26 ± 0.10	-0.67 ± 0.25	408	615	485	254	474	21	333	15.662	78.560	DL-S
Jotunfonna	14521		1900	1960	1990	2009	18.85 ± 1.82	18.45 ± 0.92	16.14 ± 0.37	14.05 ± 0.22	2568***	2486*	2404*	2270*	-1.4*	-2.7*	-6.7*	-2.7*	-13.4 ± 1.1	-0.70 ± 0.06	-201.72 ± 16.25	-10.62 ± 0.86	-0.63 ± 0.05	299	691	529	229	511	8.5	24	16.113	78.608	DL-S
Jotunfonna, length of the E lobe		Length measured from the central ice dome	1900	1960	1990	2009					n/d**	3957	3868	3612	0**	-3.0	-13.5	-3.2															DL-S
Jotunfonna, length of the NE outlet		Length measured from the highest ice on the mountain ridge	1900	1960	1990	2009					2486	2361	2196	2078	-2.1	-5.5	-6.2	-3.7															DL-S
Jotunfonna, length of the N outlet		Length measured from the central ice dome	1900	1960	1990	2009					3449	3360	3296	3202	-1.5	-2.1	-4.9	-2.3															DL-S
Jotunfonna, length of the NW outlet		Length measured from the western ice dome	1900	1960	1990	2011					2243	1880	1817	1680	-6.1	-2.1	-6.5	-5.1															DL-S
Jotunfonna, length of the W lobe		Length measured from the western ice dome	1900	1960	1990	2011					n/d**	2091	2020	1898	0**	-2.4	-5.8	-1.7															DL-S
Jotunfonna, length of the SW lobe		Length measured from the western ice dome	1900	1960	1990	2011					n/d**	1929	1874	1720	0**	-1.8	-7.3	-1.9															DL-S
Jotunfonna, length of the S lobe		Length measured from the western ice dome	1900	1960	1990	2011					n/d**	1823	1756	1702	0**	-2.2	-2.6	-1.1															DL-S
Kaalaasbreen	16733		1900	1966	1990	2011	4.31 ± 0.62	4.06 ± 0.30	3.58 ± 0.14	3.33 ± 0.08	4753	4395	4395	4333	-5.4	0	-2.9	-3.8	-7.5 ± 2.7	-0.36 ± 0.13	-26.06 ± 9.24	-1.24 ± 0.44	-0.32 ± 0.11	380	1112	652	301	609	12.2	55	15.664	79.018	DL-N
Kastellbreen	16807		1900	1966	1990	2011	1.17 ± 0.28	1.07 ± 0.12	0.88 ± 0.05	0.65 ± 0.03	2148	1944	1897	1698	-3.1	-2.0	-9.5	-4.1	-9.6 ± 6.0	-0.46 ± 0.29	-7.29 ± 4.57	-0.35 ± 0.22	-0.41 ± 0.26	373	886	641	296	608	19.7	343	15.987	78.972	DL-N
Kastelltoppen, glacier*	16808.1	Glacier on Kastelltoppen	1900	1966	1990	2011	1.23 ± 0.33	1.22 ± 0.16	0.97 ± 0.06	0.77 ± 0.03									-4.7 ± 6.1	-0.22 ± 0.29	-4.05 ± 5.29	-0.19 ± 0.25	-0.20 ± 0.26	569	904	840	519	822	10.7	272	15.989	78.962	DL-N
Kastelltoppen, glacier*	16808.2	Glacier SE from Kastelltoppen	1900	1966	1990	2011	0.84 ± 0.22	0.73 ± 0.10	0.43 ± 0.04	0.33 ± 0.02	1483	1334	1049	965	-2.3	-11.9	-4.0	-4.7	-8.2 ± 8.7	-0.39 ± 0.41	-3.12 ± 3.31	-0.15 ± 0.16	-0.35 ± 0.37	463	779	632	312	612	19.1	55	16.036	78.958	DL-N
Kastelltoppen, glacier*		Glacier NE from Kastelltoppen	1900	1966	1990	2011	0.57 ± 0.19	0.49 ± 0.08	0.27 ± 0.03	0	1529	1259	817	779	-4.1	-18.4	-1.8	-6.8	-13.0 ± 10.5	-0.62 ± 0.50	-1.78 ± 1.42	-0.08 ± 0.07	-0.56 ± 0.45	n/d**	n/d**	n/d**	276	n/d**	n/d**	n/d**	16.043	78.975	DL-N
Kastelltoppen, ice patch*		Ice patch NE from Kastelltoppen, E remnant of a former glacier	1900	1966	1990	2011	0	0	0	0.14 ± 0.01									n/d***	n/d***	n/d***	n/d***	n/d***	469	663	521	n/d*	510	18.8	44	16.048	78.976	DL-N
Kastelltoppen, ice patch*		Ice patch NE from Kastelltoppen, W remnant of a former glacier	1900	1966	1990	2011	0	0	0	0.05 ± 0.00									n/d***	n/d***	n/d***	n/d***	n/d***	702	838	765	n/d*	752	33	51	16.028	78.874	DL-N
Kinamurbreen	14611		1900	1966	1990	2011	4.63 ± 0.64	4.16 ± 0.31	3.21 ± 0.13	2.41 ± 0.06	3416	3351	3202	2395	-1.0	-6.2	-38.4	-9.2	-16.1 ± 2.9	-0.77 ± 0.14	-45.22 ± 8.07	-2.15 ± 0.38	-0.69 ± 0.12	370	848	584	216	551	12.6	12	15.964	78.809	DL-C
Lancastertoppen, ice patch*		Ice patch on Lancastertoppen	1900	1966	1990	2011	0.63 ± 0.21	0.63 ± 0.10	0.45 ± 0.04	0.40 ± 0.02									-1.8 ± 8.5	-0.09 ± 0.40	-0.77 ± 3.58	-0.04 ± 0.17	-0.08 ± 0.36	861	965	911	857	907	11.2	273	15.913	78.945	DL-N
Manchesterbreen	16816.1	Possible past surge behaviour	1900	1966	1990	2011	7.13 ± 0.74	6.82 ± 0.28	5.57 ± 0.05	4.29 ± -0.01	5879	5777	5556	5189	-1.5	-9.2	-17.5	-6.2	-22.3 ± 1.8	-1.06 ± 0.09	-109.78 ± 8.95	-5.23 ± 0.43	-0.95 ± 0.08	223	922	473	178	416	11.1	17	16.070	78.808	DL-C
Manchesterbreen basin, ice patch*		Minor ice patch disconnected from Manchesterbreen, S from 16816.2	1900	1966	1990	2011	0	0	0	0.02 ± 0.00									n/d*	n/d*	n/d*	n/d*	n/d*	562	590	565	n/d*	560	12.8	110	16.016	78.810	DL-C
Manchesterbreen basin, ice patch*	16816.2	Ice patch W from Manchesterbreen	1900	1966	1990	2011	0.40 ± 0.14	0.40 ± 0.07	0.22 ± 0.02	0.09 ± 0.01									-14.5 ± 12.8	-0.69 ± 0.61	-2.19 ± 1.93	-0.10 ± 0.09	-0.62 ± 0.55	481	593	538	397	530	14	46	16.026	78.816	DL-C
Mannbreen	16805		1900	1960	1990	2011	3.52 ± 0.59	3.19 ± -3.19	2.21 ± 0.12	1.70 ± 0.06	3922	3527	3502	3277	-6.6	-0.8	-10.7	-5.8	-14.7 ± 3.4	-0.70 ± 0.16	-28.85 ± 6.56	-1.37 ± 0.31	-0.63 ± 0.15	310	890	573	198	535	13.9	5	15.848	78.950	DL-N
Mannbreen basin, ice patch*	16805, part of	Disconnected ice patch at SW part of Mannbreen	1900	1960	1990	2011	0	0	0.35 ± 0.03	0.32 ± 0.01									-5.4 ± 9.5	-0.26 ± 0.45	-1.81 ± 3.20	-0.09 ± 0.15	-0.23 ± 0.41	590	901	730	n/d*	710	18.2	63	15.803	78.949	DL-N
Maribreen			1900	1966	1990	2011	1.06 ± 0.28	0.74 ± 0.11	0.58 ± 0.04	0.35 ± 0.02	2106	1919	1734	1586	-2.8	-7.7	-7.1	-4.7	-13.3 ± 7.1	-0.63 ± 0.34	-6.17 ± 3.27	-0.29 ± 0.16	-0.57 ± 0.30	357	741	555	253	529	19.1	319	15.403	78.950	DL-N
McWhaebreen	16838		1900	1966	1990	2011	6.80 ± 0.81	6.39 ± 0.39	5.47 ± 0.15	4.17 ± 0.09	5224	5122	4858	4354	-1.5	-11.0	-24.0	-7.8	-20.5 ± 1.7	-0.98 ± 0.08	-99.50 ± 7.88	-4.74 ± 0.38	-0.88 ± 0.08	201	769	415	142	379	8.7	17	16.643	78.772	DL-C
Medalsnuten, glacier*		Cirque glacier N from Medalsnuten peak	1900	1960	1990	2011	0.32 ± 0.13	0.25 ± 0.05	0.17 ± 0.02	0.11 ± 0.01									-13.6 ± 8.1	-0.65 ± 0.39	-1.89 ± 1.12	-0.09 ± 0.05	-0.58 ± 0.35	383	553	561	296	451	20.8	11	15.696	78.885	DL-N
Menkaurafjellet, glacier*	16819	Glacier E from Menkaurafjellet, 1960-1990 dH/dt = -0.68 ± 0.29 m a-1 (Małecki, 2013)	1900	1966	1990	2011	1.80 ± 0.35	1.72 ± 0.17	1.34 ± 0.06	1.04 ± 0.03	2319	2235	2148	1924	-1.3	-3.6	-10.7	-3.6	-18.2 ± 2.8	-0.87 ± 0.13	-21.65 ± 3.25	-1.03 ± 0.15	-0.78 ± 0.12	270	558	416	221	395	9.8	64	16.530	78.775	DL-C
Muninbreen, eastern glacier	14516.2	1960-1990 dH/dt = -0.46 ± 0.23 m a-1 (Małecki, 2013)	1900	1960	1990	2009	3.21 ± 0.60	2.85 ± 0.29	2.54 ± 0.11	2.03 ± 0.07	4070	3762	3524	3196	-5.1	-7.9	-17.3	-8	-16.0 ± 2.6	-0.84 ± 0.14	-36.48 ± 5.95	-1.92 ± 0.31	-0.76 ± 0.13	238	742	477	180	438	11	263	16.176	78.714	DL-C
Muninbreen eastern basin, ice apron*		Ice apron N from the main Reuterskioldfjellet peak	1900	1966	1990	2011	0.39 ± 0.17	0.39 ± 0.09	0.34 ± 0.04	0.29 ± 0.02									-6.4 ± 10.0	-0.30 ± 0.48	-1.98 ± 3.12	-0.09 ± 0.15	-0.27 ± 0.43	704	1029	839	676	825	29.2	348	16.183	78.704	DL-C
Muninbreen, western glacier	14516.1	1960-1990 dH/dt = -0.66 ± 0.18 m a-1 (Małecki, 2013)	1900	1960	1990	2009	4.33 ± 0.65	4.08 ± 0.31	3.72 ± 0.14	2.76 ± 0.08	5498	5418	5086	4645	-1.3	-11.0	-23.2	-7.8	-18.9 ± 2.2	-0.99 ± 0.11	-61.23 ± 6.84	-3.22 ± 0.36	-0.89 ± 0.10	227	772	435	181	409	8.8	216	16.117	78.728	DL-C
Muninbreen western basin, glacier*		Glacier at Huginaspisskaret	1900	1960	1990	2009	0.39 ± 0.14	0.28 ± 0.05	0.18 ± 0.02	0.13 ± 0.01									-12.4 ± 8.4	-0.65 ± 0.44	-1.90 ± 1.29	-0.10 ± 0.07	-0.59 ± 0.40	462	580	510	378	504	16.6	62	16.033	78.718	DL-C
Muninbreen western basin, glacier*		Glacier melted out W from Muninbreen moraines	1900	1960	1990	2009	0.42 ± 0.15	0.19 ± 0.05	0.06 ± 0.02	0									-14.0 ± 21.9	-0.74 ± 1.15	-0.45 ± 0.69	-0.02 ± 0.04	-0.67 ± 1.04	n/d**	n/d**	n/d**	249	n/d**	n/d**	n/d**	16.037	78.707	DL-C
Muninbreen western basin, ice apron*		Ice apron SW from Saetherfjellet peak	1900	1966	1990	2011	0.12 ± 0.09	0.12 ± 0.05	0.11 ± 0.02	0.10 ± 0.01									-3.0 ± 16.8	-0.14 ± 0.80	-0.31 ± 1.77	-0.01 ± 0.08	-0.13 ± 0.72	758	959	880	727	865	32.8	344	16.170	78.729	DL-C
Munindalen, glacier*	14517	Glacier SE from Gnå	1900	1966	1990	2009	2.03 ± 0.36	1.62 ± 0.16	1.22 ± 0.06	0.69 ± 0.02	2557	2340	2066	1754	-3.3	-11.4	-16.5	-7.4	-18.3 ± 3.3	-0.96 ± 0.17	-17.46 ± 3.09	-0.92 ± 0.16	-0.86 ± 0.16	264	557	385	177	367	12.3	52	16.011	78.690	DL-C
Munindalen, ice apron*		Ice apron W from 14517	1900	1966	1990	2009	0.17 ± 0.10	0.17 ± 0.05	0.12 ± 0.02	0.10 ± 0.01									-6.0 ± 16.6	-0.32 ± 0.87	-0.69 ± 1.89	-0.04 ± 0.10	-0.29 ± 0.79	627	802	721	575	709	29	83	15.961	78.690	DL-C
Munindalen, ice apron*		Ice apron SW from 14517	1900	1966	1990	2009	0.13 ± 0.08	0.13 ± 0.04	0.10 ± 0.02	0.07 ± 0.01									-8.9 ± 19.6	-0.47 ± 1.03	-0.78 ± 1.71	-0.04 ± 0.09	-0.42 ± 0.93	563	778	658	533	651	24.8	52	15.975	78.686	DL-C
Munindalen, ice apron*		Ice apron SE from 14517, N from Odinfjellet	1900	1966	1990	2009	0.09 ± 0.07	0.09 ± 0.03	0.08 ± 0.01	0.07 ± 0.01									-4.5 ± 20.2	-0.24 ± 1.06	-0.35 ± 1.56	-0.02 ± 0.08	-0.21 ± 0.95	569	782	691	497	680	30.1	360	16.036	78.684	DL-C
Munindalen, ice apron*		Ice apron S from 14517	1900	1966	1990	2011	0.16 ± 0.13	0.16 ± 0.07	0.10 ± 0.02	0.09 ± 0.01									-7.2 ± 17.5	-0.34 ± 0.84	-0.69 ± 1.70	-0.03 ± 0.08	-0.31 ± 0.75	576	757	690	581	679	30	5	15.998	78.683	DL-C
Murfjellet, glacier*	14610	Glacier N from Murfjellet peak	1900	1966	1990	2011	0.70 ± 0.21	0.63 ± 0.09	0.51 ± 0.03	0.30 ± 0.02	1581	1356	1212	950	-3.4	-6.0	-12.5	-5.7	-12.6 ± 9.4	-0.60 ± 0.45	-5.14 ± 3.83	-0.24 ± 0.18	-0.54 ± 0.40	532	934	690	328	670	21	344	15.888	78.811	DL-C
Murfjellet, glacier*	14609	Glacier W from Murfjellet peak	1900	1966	1990	2011	1.00 ± 0.28	0.90 ± 0.12	0.66 ± 0.05	0.41 ± 0.03	2524	2213	2145	1880	-4.7	-2.8	-12.6	-5.8	-18.1 ± 6.8	-0.86 ± 0.32	-9.70 ± 3.60	-0.46 ± 0.17	-0.78 ± 0.29	366	756	565	230	541	13.3	10	15.835	78.807	DL-C
Njordfjellet, glacier*	14601.8	Glacier on the E slopes of Njordfjellet	1900	1966	1990	2011	0.71 ± 0.19	0.61 ± 0.09	0.51 ± 0.03	0.32 ± 0.02	1448	1333	1188	1046	-1.7	-6.1	-6.7	-3.6	-16.9 ± 5.3	-0.81 ± 0.25	-7.02 ± 2.19	-0.33 ± 0.10	-0.73 ± 0.23	399	618	465	352	455	13.3	69	15.831	78.631	DL-S
Njordfjellet, glacier*	14601.4	Glacier on the NE slopes of Njordfjellet	1900	1966	1990	2011	0.44 ± 0.17	0.38 ± 0.08	0.20 ± 0.02	0.09 ± 0.01	1321	1234	962	790	-1.3	-11.3	-8.2	-4.8	-17.4 ± 12.0	-0.83 ± 0.57	-2.49 ± 1.69	-0.12 ± 0.08	-0.75 ± 0.51	432	629	527	342	510	19.7	50	15.810	78.636	DL-S
Njordfjellet, glacier*	14601.6	Glacier on the NW slopes of Njordfjellet	1900	1966	1990	2011	0.80 ± 0.25	0.68 ± 0.11	0.53 ± 0.05	0.24 ± 0.02	2112	1876	1651	1373	-3.6	-9.4	-13.3	-6.7	-16.0 ± 7.4	-0.76 ± 0.35	-6.19 ± 2.84	-0.29 ± 0.14	-0.69 ± 0.32	363	627	529	283	510	17	282	15.769	78.637	DL-S
Njordfjellet, glacier*	14601.8	Glacier on the S slopes of Njordfjellet, connected with 14601.7	1900	1966	1990	2011	0.38 ± 0.13	0.38 ± 0.06	0.25 ± 0.02	0.16 ± 0.01									-13.3 ± 11.0	-0.63 ± 0.52	-2.73 ± 2.24	-0.13 ± 0.11	-0.57 ± 0.47	487	607	560	477	555	11.5	179	15.774	78.615	DL-S
Njordfjellet, glacier*	14601.1+14601.2	Glacier on the SE slopes of Njordfjellet	1900	1966	1990	2011	2.35 ± 0.53	2.28 ± 0.26	1.48 ± 0.08	0.81 ± 0.03									-15.2 ± 4.0	-0.72 ± 0.19	-17.38 ± 4.49	-0.83 ± 0.21	-0.65 ± 0.17	403	645	525	334	516	9.6	120	15.833	78.621	DL-S
Njordfjellet, glacier*	14601.8	Glacier on the SW slopes of Njordfjellet	1900	1966	1990	2011	2.52 ± 0.62	2.52 ± 0.31	1.39 ± 0.07	1.11 ± 0.04									-13.0 ± 4.7	-0.62 ± 0.22	-16.16 ± 5.83	-0.77 ± 0.28	-0.56 ± 0.20	399	645	568	356	553	10.3	243	15.725	78.615	DL-S
Njordfjellet, glacier*	14601.7, part of	Glacier on the W slopes of Njordfjellet, S part of the glacier	1900	1966	1990	2011	1.00 ± 0.30	0.78 ± 0.12	0.67 ± 0.05	0.53 ± 0.03	2180	1645	1627	1562	-8.1	-0.7	-3.1	-5.6	-15.1 ± 5.4	-0.72 ± 0.26	-9.06 ± 3.20	-0.43 ± 0.15	-0.65 ± 0.23	311	616	468	215	420	13.7	319	15.773	78.621	DL-S
Njordfjellet, ice patch*	14601.7, part of	Glacier on the W slopes of Njordfjellet, N part of the glacier	1900	1966	1990	2011	0.36 ± 0.18	0.32 ± 0.07	0.26 ± 0.04	0.15 ± 0.02									-11.1 ± 11.0	-0.53 ± 0.52	-2.28 ± 2.25	-0.11 ± 0.11	-0.47 ± 0.47	429	635	559	371	544	22.4	255	15.792	78.629	DL-S
Njordfjellet, ice patch*	14601.5	Ice patch on the N slopes of Njordfjellet	1900	1966	1990	2011	0.09 ± 0.08	0.09 ± 0.04	0.08 ± 0.01	0.04 ± 0.00									-10.6 ± 24.9	-0.51 ± 1.18	-0.61 ± 1.42	-0.03 ± 0.07	-0.46 ± 1.07	534	592	560	467	556	17.2	41	15.793	78.641	DL-S
Odellfjellet, ice patch*		Ice patch N from Odellfjellet peak, upper part	1900	1966	1990	2011	0.48 ± 0.20	0.45 ± 0.09	0.22 ± 0.03	0.06 ± 0.01									-21.2 ± 17.4	-1.01 ± 0.83	-3.04 ± 2.48	-0.14 ± 0.12	-0.91 ± 0.75	483	864	729	266	698	30	8	16.242	78.877	DL-N
Odellfjellet, ice patch*		Ice patch N from Odellfjellet peak, lower part	1900	1966	1990	2011	0	0	0	0.03 ± 0.01									n/d***	n/d***	n/d***	n/d***	n/d***	627	779	681	n/d*	674	26.7	26	16.225	78.877	DL-N
Odinfjellet, glacier*	14518	Glacier E from Odinfjellet	1900	1966	1990	2009	0.76 ± 0.21	0.76 ± 0.10	0.42 ± 0.03	0.32 ± 0.02									-12.7 ± 9.2	-0.67 ± 0.49	-4.70 ± 3.41	-0.25 ± 0.18	-0.60 ± 0.44	502	734	626	471	614	14.7	241	16.020	78.679	DL-S
Pollockbreen	14507.1		1900	1966	1990	2011	2.52 ± 0.56	2.08 ± 0.25	1.57 ± 0.09	1.35 ± 0.05	4181	3187	3050	2969	-15.1	-5.7	-3.8	-10.9	n/d*	n/d*	n/d*	n/d*	n/d*	311	952	578	125	535	16.4	230	16.861	78.703	DL-C
Pollockbreen basin, ice patch*	14507.2	Ice patch N from minor, ca. 700 m peak of DeGeerfjellet	1900	1966	1990	2011	0	0	0.11 ± 0.02	0.07 ± 0.01									n/d*	n/d*	n/d*	n/d*	n/d*	442	633	535	n/d*	512	22.1	295	16.844	78.695	DL-C
Purpurbreen	16806		1900	1966	1990	2011	1.57 ± 0.35	1.39 ± 0.16	1.04 ± 0.07	0.86 ± 0.04	2942	2829	2714	2513	-1.7	-4.8	-9.6	-3.9	-11.6 ± 4.7	-0.55 ± 0.22	-10.99 ± 4.41	-0.52 ± 0.21	-0.50 ± 0.20	329	928	564	250	528	16	6	15.921	78.955	DL-N
Pyramiden, ice patch*		Ice patch NW from Pyramiden peak	1900	1966	1990	2009	0.28 ± 0.12	0.23 ± 0.05	0.16 ± 0.03	0.09 ± 0.01									-7.7 ± 16.9	-0.41 ± 0.89	-0.99 ± 2.17	-0.05 ± 0.11	-0.36 ± 0.80	569	682	590	490	583	18	270	16.339	78.680	DL-C
Ragnarbreen	14510	Ice divides adopted from König et al. (2013) & Nuth et al. (2013)	1900	1961	1990	2011	11.23 ± 0.89	10.11 ± 0.43	9.20 ± 0.15	8.29 ± 0.08	7683	7188	6615	6038	-8.1	-19.7	-27.5	-14.8	n/d*	n/d*	n/d*	n/d*	n/d*	74	698	525	56	497	6.4	254	16.798	78.766	DL-C
Ragnardalen, glacier*		Cirque glacier on NW slopes of Pukkelkammen	1900	1966	1990	2011	0.63 ± 0.17	0.35 ± 0.06	0.27 ± 0.02	0.20 ± 0.01									n/d*	n/d*	n/d*	n/d*	n/d*	466	669	549	244	535	21	313	16.760	78.748	DL-C
Rebbingen, ice patch*		Ice patch S from Rebbingen	1900	1966	1990	2011	0.30 ± 0.14	0.20 ± 0.05	0.16 ± 0.02	0.05 ± 0.00									-18.4 ± 15.5	-0.87 ± 0.74	-1.92 ± 1.60	-0.09 ± 0.08	-0.79 ± 0.66	488	588	535	293	529	21.9	285	15.483	78.865	DL-N
Rebbingen, ice patch*		Ice patch on Rebbingen	1900	1966	1990	2011	0.67 ± 0.22	0.67 ± 0.11	0.45 ± 0.04	0.31 ± 0.02									-11.1 ± 9.6	-0.53 ± 0.46	-4.19 ± 3.62	-0.20 ± 0.17	-0.47 ± 0.41	577	834	771	433	761	13.7	321	15.450	78.880	DL-N
Reuterskioldfjellet, ice patch*		Ice patch W from Reuterskioldfjellet peak	1900	1966	1990	2011	0.21 ± 0.13	0.21 ± 0.06	0.10 ± 0.02	0									-8.7 ± 17.1	-0.41 ± 0.81	-0.43 ± 0.85	-0.02 ± 0.04	-0.37 ± 0.73	n/d**	n/d**	n/d**	335	n/d**	n/d**	n/d**	16.194	78.688	DL-C
Robertsonbreen	14608.1		1900	1966	1990	2011	4.12 ± 0.55	3.08 ± 0.24	2.62 ± 0.09	2.21 ± 0.04	4346	3862	3278	3030	-7.3	-24.3	-11.8	-11.9	-13.2 ± 3.2	-0.63 ± 0.15	-31.80 ± 7.65	-1.51 ± 0.36	-0.56 ± 0.14	332	861	645	242	610	10.1	268	15.991	78.791	DL-C
Robertsonbreen basin, ice patch*	14608.2	Ice patch S from Robertsonbreen	1900	1966	1990	2009	0.94 ± 0.21	0.94 ± 0.10	0.48 ± 0.03	0.23 ± 0.01									-13.1 ± 9.4	-0.69 ± 0.50	-4.69 ± 3.35	-0.25 ± 0.18	-0.62 ± 0.45	487	676	570	384	560	16.3	327	15.961	78.781	DL-C
Saurieberget, glacier*	14522.4	Glacier in the N of Saurieberget, S from Frostisen	1900	1966	1990	2011	2.34 ± 0.44	2.18 ± 0.21	1.67 ± 0.08	1.12 ± 0.04	2732	2493	2266	1919	-3.6	-9.5	-16.5	-7.3	-15.7 ± 3.7	-0.75 ± 0.17	-21.88 ± 5.04	-1.04 ± 0.24	-0.67 ± 0.16	295	632	529	234	517	10.5	292	15.707	78.522	DL-S
Sfinksen, ice patch*		Ice patch W from Sfinksen summit	1900	1966	1990	2011	0.10 ± 0.07	0.10 ± 0.03	0.12 ± 0.02	0.06 ± 0.01									-3.0 ± 20.5	-0.14 ± 0.98	-0.27 ± 1.84	-0.01 ± 0.09	-0.13 ± 0.88	583	786	650	572	639	28.3	217	16.594	78.756	DL-C
Sivfjella, ice patch*		Ice patch in Sivfjella	1900	1966	1990	2011	0.25 ± 0.13	0.19 ± 0.05	0.11 ± 0.02	0.05 ± 0.01									-16.4 ± 11.4	-0.78 ± 0.54	-1.35 ± 0.93	-0.06 ± 0.04	-0.70 ± 0.49	389	499	449	271	439	17.9	43	15.738	78.646	DL-S
Sjursethfossen, ice patch*		Ice patch S from 14602.3	1900	1966	1990	2011	0.46 ± 0.19	0.41 ± 0.08	0.24 ± 0.03	0									-18.2 ± 11.3	-0.87 ± 0.54	-2.17 ± 1.33	-0.10 ± 0.06	-0.78 ± 0.48	n/d**	n/d**	n/d**	375	n/d**	n/d**	n/d**	15.859	78.661	DL-S
Sjursethfossen, ice patch*		Ice patch SE from 14602.3	1900	1966	1990	2011	0	0	0	0.08 ± 0.01									n/d***	n/d***	n/d***	n/d***	n/d***	475	635	531	n/d*	518	22	43	15.863	78.66	DL-S
Sjursethfossen, ice patch*		Ice patch S from 14602.3	1900	1966	1990	2011	0	0	0	0.03 ± 0.00									n/d***	n/d***	n/d***	n/d***	n/d***	590	688	646	n/d*	640	27.9	66	15.844	78.662	DL-S
Skåla, ice patch*		Ice patch N from Skåla	1900	1966	1990	2011	0.96 ± 0.26	0.96 ± 0.13	0.59 ± 0.04	0.44 ± 0.03									-7.9 ± 8.0	-0.38 ± 0.38	-4.09 ± 4.12	-0.19 ± 0.20	-0.34 ± 0.34	600	802	695	512	683	18.4	350	15.848	79.031	DL-N
Skansdalen, glacier*	14523	Central glacier in Høgskulefjellet massif	1900	1966	1990	2011	1.62 ± 0.34	1.46 ± 0.15	1.15 ± 0.06	0.80 ± 0.03	2267	1933	1858	1613	-5.1	-3.1	-11.7	-5.9	-16.4 ± 3.3	-0.78 ± 0.16	-15.96 ± 3.15	-0.76 ± 0.15	-0.70 ± 0.14	305	566	415	184	390	11.3	41	15.886	78.534	DL-S
Skansdalen, ice patch*		Niche glacier NE from Frostistinden, N from 14523	1900	1966	1990	2011	0.98 ± 0.28	0.98 ± 0.14	0.35 ± 0.03	0.11 ± 0.01									-18.6 ± 7.1	-0.89 ± 0.34	-4.28 ± 1.62	-0.20 ± 0.08	-0.80 ± 0.31	387	540	432	309	425	17.7	27	15.842	78.544	DL-S
Skansdalen, ice patch*		Cirque glacier on E slopes of Høgskulefjellet, S from 14523	1900	1966	1990	2011	0.31 ± 0.13	0.28 ± 0.06	0.17 ± 0.02	0.07 ± 0.01									-12.5 ± 9.4	-0.60 ± 0.45	-1.53 ± 1.15	-0.07 ± 0.05	-0.54 ± 0.40	424	568	488	299	478	24.7	68	15.915	78.520	DL-S
Skrabreen	16809		1900	1966	1990	2011	1.94 ± 0.36	1.86 ± 0.17	1.52 ± 0.07	1.29 ± 0.03	2812	2696	2572	2424	-1.8	-5.2	-7.1	-3.5	-12.0 ± 4.6	-0.57 ± 0.22	-16.87 ± 6.40	-0.80 ± 0.30	-0.51 ± 0.20	457	920	700	402	669	13.5	103	15.793	78.923	DL-N
Snøplogen, glacier*	16802	Glacier between Arbobreen and Kaalaasbreen	1900	1966	1990	2011	5.12 ± 0.70	4.72 ± 0.33	4.07 ± 0.13	3.64 ± 0.08	5406	4751	4760	4506	-9.9	0.4	-12.1	-8.1	-11.6 ± 2.6	-0.55 ± 0.12	-44.82 ± 9.99	-2.13 ± 0.48	-0.50 ± 0.11	358	1026	636	232	616	11.4	48	15.660	78.998	DL-N
Sophusbreen	14612		1900	1966	1990	2011	2.71 ± 0.50	2.44 ± 0.24	1.98 ± 0.09	1.41 ± 0.05	4398	4336	4124	3771	-0.9	-8.8	-16.8	-5.6	-22.0 ± 3.5	-1.05 ± 0.17	-37.30 ± 5.77	-1.78 ± 0.27	-0.94 ± 0.15	271	917	515	206	472	11.3	256	15.670	78.856	DL-N
Sophusbreen basin, ice patch*		Ice patch S from Sophusbreen	1900	1966	1990	2011	0.74 ± 0.19	0.74 ± 0.09	0.58 ± 0.04	0.29 ± 0.01									-6.3 ± 9.4	-0.30 ± 0.45	-2.74 ± 4.08	-0.13 ± 0.19	-0.27 ± 0.40	706	930	819	612	802	15.8	229	15.677	78.847	DL-N
Southamptonbreen	16817		1900	1966	1990	2009	3.86 ± 0.61	3.73 ± 0.30	3.14 ± 0.12	2.39 ± 0.07	4935	4887	4670	4303	-0.7	-9.0	-19.3	-5.8	-16.2 ± 2.8	-0.85 ± 0.15	-44.81 ± 7.57	-2.36 ± 0.40	-0.77 ± 0.13	221	897	555	176	526	12	3	16.147	78.803	DL-C
Southamptonbreen basin, glacier*	16899.02	Glacier E from Southamptonbreen	1900	1966	1990	2009	0.44 ± 0.16	0.35 ± 0.08	0.25 ± 0.03	0.16 ± 0.01									-12.1 ± 12.6	-0.64 ± 0.67	-2.50 ± 2.60	-0.13 ± 0.14	-0.57 ± 0.60	501	782	608	354	596	22.1	314	16.193	78.818	DL-C
Stensiobreen	14606		1900	1966	1990	2009	2.71 ± 0.37	2.71 ± 0.18	2.49 ± 0.07	2.40 ± 0.04	n/d**	2270	2248	2226	0**	-0.9	-1.2	-0.4	-11.2 ± 3.3	-0.59 ± 0.17	-27.33 ± 8.09	-1.44 ± 0.43	-0.53 ± 0.16	482	962	633	480	611	10.3	258	16.042	78.749	DL-C
Storskarvet/Kilen, glacier*	14605.1	Southern part of a glacier between Storskarvet and Kilen	1900	1966	1990	2009	1.38 ± 0.30	1.24 ± 0.16	0.95 ± 0.05	0.82 ± 0.02	2322	2228	2118	1828	-1.4	-4.6	-15.3	-4.5	-14.5 ± 4.5	-0.76 ± 0.24	-12.86 ± 3.97	-0.68 ± 0.21	-0.69 ± 0.21	406	697	540	344	522	12.7	311	16.023	78.730	DL-C
Storskarvet/Kilen, ice apron*		Ice apron hanging E from Storskarvet, separated from 14605.1	1900	1966	1990	2009	0	0	0.10 ± 0.01	0.09 ± 0.01									-9.4 ± 18.3	-0.49 ± 0.96	-0.88 ± 1.70	-0.05 ± 0.09	-0.45 ± 0.86	696	878	785	696	770	30.3	37	16.017	78.725	DL-C
Storskarvet/Kilen, glacier*	14605.2	Northern part of a glacier between Storskarvet and Kilen	1900	1966	1990	2009	0.78 ± 0.21	0.77 ± 0.09	0.67 ± 0.04	0.51 ± 0.02									-13.2 ± 7.4	-0.70 ± 0.39	-7.81 ± 4.33	-0.41 ± 0.23	-0.63 ± 0.35	515	780	651	494	640	15.6	347	16.053	78.738	DL-C
Storskarvet/Kilen, ice apron*		Ice patch on Kilen	1900	1966	1990	2009	0.19 ± 0.10	0.19 ± 0.05	0.15 ± 0.02	0.13 ± 0.01									-5.1 ± 15.0	-0.27 ± 0.79	-0.71 ± 2.09	-0.04 ± 0.11	-0.24 ± 0.71	818	991	912	801	900	15.7	212	16.095	78.743	DL-C
Studentdalen, glacier*	14522.5	Glacier at the head of Studentdalen, S from Frostisen	1900	1966	1990	2011	1.95 ± 0.40	1.83 ± 0.19	1.16 ± 0.06	0.73 ± 0.04	2505	2304	2158	1747	-3.0	-6.1	-19.6	-6.8	-20.1 ± 3.7	-0.96 ± 0.18	-19.09 ± 3.41	-0.91 ± 0.16	-0.86 ± 0.16	286	597	451	169	416	11.9	104	15.748	78.527	DL-S
Svenbreen	14512	1960-1990 dH/dt = -0.32 ± 0.19 m a-1 (Małecki, 2013)	1900	1966	1990	2009	5.73 ± 0.92	4.46 ± 0.39	4.09 ± 0.17	3.82 ± 0.09	5184	4034	3877	3781	-17.4	-6.5	-5.1	-12.9	-12.3 ± 1.8	-0.65 ± 0.09	-48.52 ± 6.87	-2.55 ± 0.36	-0.58 ± 0.08	170	725	458	27	410	10.4	63	16.275	78.727	DL-C
Torfjellet, ice patch*	14520.2	Ice patch E from Torfjellet	1900	1966	1990	2011	0.59 ± 0.17	0.59 ± 0.08	0.35 ± 0.03	0.21 ± 0.02									-15.4 ± 7.4	-0.73 ± 0.35	-4.27 ± 2.04	-0.20 ± 0.10	-0.66 ± 0.32	447	631	520	411	510	14.7	305	15.931	78.651	DL-S
Torfjellet, ice patch*	14520.1	Ice patch N from Torfjellet	1900	1966	1990	2011	1.02 ± 0.23	1.02 ± 0.11	0.55 ± 0.04	0.21 ± 0.01									-11.8 ± 9.4	-0.56 ± 0.45	-4.46 ± 3.56	-0.21 ± 0.17	-0.50 ± 0.40	498	728	581	378	570	25.9	355	15.968	78.655	DL-S
Torfjellet, ice patch*		Ice patch N from Torfjellet, disconnected from 14520.1	1900	1966	1990	2011	0	0	0	0.02 ± 0.00									n/d***	n/d***	n/d***	n/d***	n/d***	660	738	691	n/d*	685	18.7	331	15.966	78.653	DL-S
Trikolorfjellet, ice patch*		Ice patch on Trikolorfjellet	1900	1966	1990	2011	0.19 ± 0.10	0.19 ± 0.05	0.14 ± 0.02	0.10 ± 0.01									-5.5 ± 16.5	-0.26 ± 0.78	-0.67 ± 2.01	-0.03 ± 0.10	-0.24 ± 0.71	567	771	658	520	646	22.5	322	16.448	78.812	DL-C
Triungen, glacier*		Glacier E from 905 m Triungen peak	1900	1966	1990	2009	0.58 ± 0.18	0.49 ± 0.08	0.39 ± 0.04	0.19 ± 0.01									-12.0 ± 10.1	-0.63 ± 0.53	-3.48 ± 2.92	-0.18 ± 0.15	-0.57 ± 0.48	483	668	579	341	565	18.4	354	15.875	78.772	DL-C
Triungen, glacier*		Glacier W from 905 m Triungen peak	1900	1966	1990	2011	0.85 ± 0.23	0.82 ± 0.11	0.66 ± 0.04	0.42 ± 0.02									-13.1 ± 6.8	-0.62 ± 0.33	-7.07 ± 3.67	-0.34 ± 0.17	-0.56 ± 0.29	465	691	560	334	550	15.6	326	15.805	78.766	DL-C
Vasskillbreen Nordre	16810	Possible past surge behaviour	1900	1966	1990	2011	2.95 ± 0.56	2.74 ± 0.28	2.26 ± 0.11	1.58 ± 0.06	4576	4541	4541	3864	-0.5	0	-32.2	-6.4	-16.6 ± 3.4	-0.79 ± 0.16	-31.92 ± 6.49	-1.52 ± 0.31	-0.71 ± 0.15	308	1036	620	236	580	13.3	171	15.662	78.918	DL-N
Vasskilbreen Sore	16811	Possible past surge behaviour	1900	1960	1990	2011	6.76 ± 0.88	5.86 ± 0.45	5.02 ± 0.17	4.37 ± 0.09	6007	5765	5428	4722	-4.0	-11.2	-33.7	-11.6	-15.9 ± 2.3	-0.76 ± 0.11	-74.85 ± 10.58	-3.56 ± 0.50	-0.68 ± 0.10	229	991	561	196	520	11.6	15	15.635	78.879	DL-N
Vaskllryggen, ice patch*		Ice patch N from Vasskilryggen summit	1900	1960	1990	2011	0.19 ± 0.12	0.19 ± 0.06	0.11 ± 0.01	0.10 ± 0.01									-6.6 ± 16.8	-0.32 ± 0.80	-0.69 ± 1.76	-0.03 ± 0.08	-0.28 ± 0.72	853	1030	932	741	921	23.5	80	15.627	78.918	DL-N
Yggdrasilkampen, glacier*		Cirque glacier on N slopes of Yggdrasilkampen	1900	1966	1990	2011	0.21 ± 0.13	0.16 ± 0.05	0	0									n/d**	n/d**	n/d**	n/d**	n/d**	n/d**	n/d**	n/d**	249	n/d**	n/d**	n/d**	16.222	78.632	DL-S
Dickson Land North (DL-N)							91.76 ± 12.03	78.65 ± 3.35	63.83 ± 2.74	51.05 ± 1.43					-6.3 ± 0.2	-10.4 ± 0.2	-18.3 ± 0.1	-9.5 ± 0.1	-12.8 ± 1.1	-0.61 ± 0.05	-735 ± 46	-35.0 ± 2.3	-0.55 ± 0.04
Dickson Land Central (DL-C)							174.95 ± 18.14	159.55 ± 11.81	137.88 ± 4.10	117.07 ± 2.22					-4.7 ± 0.2	-10.1 ± 0.2	-18.1 ± 0.1	-8.4 ± 0.1	-16.6 ± 1.2*	-0.79 ± 0.06*	-1 482 ± 67*	-70.6 ± 3.3*	-0.71 ± 0.05*
Dickson Land South (DL-S)							67.40 ± 8.25	63.98 ± 4.17	50.27 ± 1.71	39.32 ± 0.92					-3.0 ± 0.2	-6.5 ± 0.3	-10.4 ± 0.1	-5.3 ± 0.1	-14.5 ± 1.2	-0.69 ± 0.06	-651 ± 37	-31.0 ± 1.8	-0.62 ± 0.05
Dickson Land TOTAL							334.11 ± 38.42	302.18 ± 19.34	251.98 ± 8.57	207.44 ± 4.56					-4.9 ± 0.1	-9.4 ± 0.1	-16.4 ± 0.1	-8.1 ± 0.1	-15.0 ± 1.0*	-0.71 ± 0.05*	-2 867 ± 116*	-136.5 ± 5.7*	-0.64 ± 0.05*
											*average from two or more profile lines								*glaciers with no 1990 DEM coverage, excluded from summation
											**no LIA moraines visible on the 1960's map				*averaged value from all centrelines				**gone by 1990 or segmented into smaller ice masses					*new unit disconnected from its mother unit
*no official name			*assumed date of maximum extent				*estimate based on the 1960/66 glacier area and its moraine zone				***averaged assuming Lmax=L1960 for some centrelines				**no LIA length data, so Lmax=L1960 assumed				***after 1990 disconnected from its mother unit					**gone or segmented into smaller ice masses
References:
König, M., Kohler, J. and Nuth, C.: Glacier Area Outlines - Svalbard. Norwegian Polar Institute (Tromsø, Norway): https://data.npolar.no/dataset/89f430f8-862f-11e2-8036-005056ad0004, 2013.
Małecki, J.: Elevation and volume changes of seven Dickson Land glaciers, Svalbard. Polar Res., 32, 18400, 2013.
Małecki, J., Faucherre, S., and Strzelecki, M.: Post-surge geometry and thermal structure of Hørbyebreen, central Spitsbergen. Pol. Polar Res. 34, 305-321, 2013.
Nuth, C., Kohler, J., König, M., von Deschwanden, A., Hagen, J.O., Kääb, A., Moholdt, G., and Pettersson, R.: Decadal changes from a multi-temporal glacier inventory of Svalbard. The Cryosphere, 7, 1603–1621, 2013.
