# Supplementary material for: Accelerating retreat and high-elevation thinning of glaciers in central Spitsbergen
Source: Copernicus journal article supplement (doi:10.5194/tc-10-1317-2016), 2016-06-24
Supplement: Supplementary file 1 [file tc-10-1317-2016-supplement.zip]

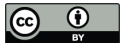

## *Supplement of*

# **Accelerating retreat and high-elevation thinning of glaciers in central Spitsbergen**

**Jakub Małecki**

*Correspondence to:* Jakub Małecki (malecki.jk@gmail.com)

- tc-10-1317-2016-supplement-title-page.pdf
- Glacier\_area\_changes\_DL-C.jpg
- Glacier\_area\_changes\_DL-N\_north.jpg
- Glacier\_area\_changes\_DL-N\_south.jpg
- Glacier\_area\_changes\_DL-S.jpg
- Readme.txt
- Supplementary\_table.xls

The copyright of individual parts of the supplement might differ from the CC-BY 3.0 licence.
